# Supplementary material
Source: PubMed Central journal article supplement (PMC4136160)
Supplement: JCM.00870-14_zjm999093646so1.pdf [file JCM.00870-14_zjm999093646so1.pdf]

1 **Supplementary Table 1.** Clinical and demographic data of patients with chronic hypertrophic  
 2 tonsillar diseases with HBoV1 detected in adenoid plus co-detection of other respiratory viruses.  
 3

| Features                   | HBoV1 alone<br>N (%) | HBoV1 + 1<br>virus<br>N (%) | HBoV + 2<br>viruses<br>N (%) | HBoV + 3<br>viruses<br>N (%) | HBoV + 4<br>viruses<br>N (%) |
|----------------------------|----------------------|-----------------------------|------------------------------|------------------------------|------------------------------|
| Patients                   | 6 (13.6%)            | 15 (34.0%)                  | 18 (40.9)                    | 4 (9.1%)                     | 1 (2.2%)                     |
| Masculine gender           | 5 (83.3%)            | 8 (53.3%)                   | 12 (66.6%)                   | 3 (75%)                      | 1 (100%)                     |
| Age (median of years)      | 5.0                  | 4.0                         | 4.0                          | 4.0                          | 5.0                          |
| 0-50% airway obstruction   | 0 (0.0%)             | 1 (6.6%)                    | 1 (5.5%)                     | 1 (25%)                      | 0 (0.0%)                     |
| 50-75% airway obstruction  | 3 (50.0%)            | 4 (26.6%)                   | 7 (38.8%)                    | 3 (75%)                      | 0 (0.0%)                     |
| 75-100% airway obstruction | 3 (50.0%)            | 10 (66.6%)                  | 10 (55.5%)                   | 0 (0.0%)                     | 1 (100%)                     |
| Sleep apnea                | 5 (83.3%)            | 10 (66.6%)                  | 11 (61.1%)                   | 2 (50.0%)                    | 1 (100%)                     |
| Secretory otitis media     | 3 (50.0%)            | 2 (13.3%)                   | 0 (0.0%)                     | 0 (0.0%)                     | 0 (0.0%)                     |
| Allergies                  | 2 (33.3%)            | 3 (20.0%)                   | 6 (33.3%)                    | 0 (0.0%)                     | 1 (100%)                     |

4  
 5  
 6 **Supplementary Table 2.** Clinical and demographic data of patients with chronic hypertrophic tonsillar  
 7 diseases with HBoV1 detected in palatine tonsils plus co-detection of other respiratory viruses.  
 8

| Features               | HBoV1 alone<br>N (%) | HBoV1 + 1<br>virus<br>N (%) | HBoV + 2<br>viruses<br>N (%) | HBoV + 3<br>viruses<br>N (%) |
|------------------------|----------------------|-----------------------------|------------------------------|------------------------------|
| Patients               | 3 (23.1%)            | 5 (38.4%)                   | 3 (23.1%)                    | 2 (15.4%)                    |
| Masculine gender       | 1 (33.3%)            | 1 (20.0%)                   | 2 (66.6%)                    | 2 (100%)                     |
| Age (median of years)  | 6.0                  | 4.0                         | 4.0                          | 4.5                          |
| Recurrent tonsillitis  | 2 (66.6%)            | 2 (40.0%)                   | 0 (0.0%)                     | 2 (100%)                     |
| Tonsillar hypertrophy  | 2 (66.6%)            | 4 (80.0%)                   | 3 (100%)                     | 2 (100%)                     |
| Sleep apnea            | 2 (66.6%)            | 5 (100%)                    | 3 (100%)                     | 1 (50.0%)                    |
| Secretory otitis media | 0 (0.0%)             | 0 (0.0%)                    | 1 (33.3%)                    | 0                            |
| Allergies              | 1 (33.3%)            | 0 (0.0%)                    | 0 (0.0%)                     | 1 (50.0%)                    |

9  
 10  
 11 **Supplementary Table 3.** Clinical and demographic data of patients with detectable HBoV1 VP1 or  
 12 NP1 mRNAs in adenoids.  
 13  
 14

|                                      | Hypertrophic Patients |                     | Control Patients |                     |
|--------------------------------------|-----------------------|---------------------|------------------|---------------------|
|                                      | mRNA +                | mRNA -              | mRNA +           | mRNA -              |
| Patients                             | 12                    | 32                  | 0                | 4                   |
| Masculine gender                     | 9 (75.0%)             | 20 (62.5%)          | -                | 3 (75.0%)           |
| Age (median of years)                | 4.0                   | 4.0                 | -                | 2.0                 |
| Viral co-infection                   | 38 (86.4%)            | 69 (53.1%)          | -                | 2 (50.0%)           |
| Viral load (median copies/g)*        | 2.3x10 <sup>7</sup>   | 6.6x10 <sup>5</sup> | -                | 4.1x10 <sup>4</sup> |
| High viral load (>10 <sup>6</sup> )* | 10 (83.3%)            | 13 (40.6%)          | -                | 0 (0.0%)            |
| Detection in several sites*          | 8 (66.6%)             | 7 (21.8%)           | -                | 1 (25%)             |
| HBoV1 shedding in NPS*               | 6 (50.0%)             | 6 (18.7%)           | -                | 1 (25%)             |
| 0-50% airway obstruction             | 1 (8.3%)              | 2 (6.2%)            | -                | -                   |
| 50-75% airway obstruction            | 5 (41.6%)             | 12 (37.5%)          | -                | -                   |
| 75-100% airway obstruction           | 6 (50.0%)             | 18 (56.2%)          | -                | -                   |
| Sleep apnea                          | 7 (58.3.9%)           | 22 (68.7%)          | -                | -                   |
| Secretory otitis media               | 0 (0.0%)              | 5 (15.6%)           | -                | -                   |
| Allergies                            | 4 (33.3%)             | 8 (25.0%)           | -                | -                   |

15  
 16 \* p<0.05.  
 17  
 18  
 19  
 20

21 **Supplementary Table 4.** Clinical and demographic data of patients with detectable HBoV1 VP1 or  
 22 NP1 mRNAs in palatine tonsils.  
 23  
 24

|                                     | Hypertrophic Patients |                     | Control Patients |        |
|-------------------------------------|-----------------------|---------------------|------------------|--------|
|                                     | mRNA +                | mRNA -              | mRNA +           | mRNA - |
| Patients                            | 1                     | 12                  | -                | -      |
| Masculine gender                    | 1 (100%)              | 5 (41.6%)           | -                | -      |
| Age (median of years)               | 5.0                   | 4.0                 | -                | -      |
| Viral co-infection                  | 1 (100%)              | 9 (75.0%)           | -                | -      |
| Viral load (median copies/g)        | 2.2x10 <sup>9</sup>   | 8.4x10 <sup>4</sup> | -                | -      |
| High viral load (>10 <sup>6</sup> ) | 1 (100%)              | 2 (16.6%)           | -                | -      |
| Detection in several sites          | 1 (100%)              | 6 (50.0%)           | -                | -      |
| HBoV1 shedding in NPS               | 0 (0.0%)              | 1 (8.3%)            | -                | -      |
| Recurrent tonsillitis               | 1 (100%)              | 5 (41.6%)           | -                | -      |
| Tonsillar hypertrophy               | 1 (100%)              | 10 (83.3%)          | -                | -      |
| Sleep apnea                         | 1 (100%)              | 10 (83.3%)          | -                | -      |
| Secretory otitis media              | 0 (0.0%)              | 1 (8.3%)            | -                | -      |
| Allergies                           | 1 (100%)              | 1 (8.3%)            | -                | -      |

25  
 26  
 27 **Supplementary Table 5.** Frequency of mRNA detection in adenoids (AD), palatine tonsils (PT) and  
 28 nasopharyngeal secretions (NPS) from patients with single HBoV1 infection and in those co-infected  
 29 by one to four additional respiratory viruses.  
 30

| Viruses Detected                | AD               |                  | PT              |                  | NPS             |                  |
|---------------------------------|------------------|------------------|-----------------|------------------|-----------------|------------------|
|                                 | mRNA +<br>N (%)  | mRNA -<br>N (%)  | mRNA +<br>N (%) | mRNA -<br>N (%)  | mRNA +<br>N (%) | mRNA -<br>N (%)  |
| Only HBoV                       | 1 (8.3)          | 5 (15.6)         | 0 (0.0)         | 3 (25.0)         | 0 (0.0)         | 3 (20.0)         |
| HBoV + HAdV                     | 2 (16.7)         | 6 (18.8)         | 0 (0.0)         | 3 (25.0)         | 0 (0.0)         | 3 (20.0)         |
| HBoV + HRV                      | 0 (0.0)          | 1 (3.1)          | 0 (0.0)         | 1 (8.3)          | 0 (0.0)         | 1 (6.7)          |
| HBoV + HEV                      | 0 (0.0)          | 4 (12.5)         | 0 (0.0)         | 0 (0.0)          | 0 (0.0)         | 2 (13.3)         |
| HBoV + HRSV                     | 0 (0.0)          | 1 (3.1)          | 0 (0.0)         | 0 (0.0)          | 0 (0.0)         | 0 (0.0)          |
| HBoV + HMPV                     | 0 (0.0)          | 0 (0.0)          | 0 (0.0)         | 1 (8.3)          | 0 (0.0)         | 0 (0.0)          |
| HBoV + FLU                      | 0 (0.0)          | 1 (3.1)          | 0 (0.0)         | 0 (0.0)          | 0 (0.0)         | 0 (0.0)          |
| HBoV + HAdV + HRV               | 2 (16.7)         | 3 (9.4)          | 0 (0.0)         | 0 (0.0)          | 1 (25.0)        | 2 (13.3)         |
| HBoV + HAdV + HEV               | 2 (16.7)         | 3 (9.4)          | 0 (0.0)         | 3 (25.0)         | 0 (0.0)         | 2 (13.3)         |
| HBoV + HAdV + HRSV              | 0 (0.0)          | 1 (3.1)          | 0 (0.0)         | 0 (0.0)          | 1 (25.0)        | 0 (0.0)          |
| HBoV + HAdV + HMPV              | 0 (0.0)          | 1 (3.1)          | 0 (0.0)         | 0 (0.0)          | 0 (0.0)         | 0 (0.0)          |
| HBoV + HRV + HEV                | 0 (0.0)          | 1 (3.1)          | 0 (0.0)         | 0 (0.0)          | 1 (25.0)        | 1 (6.7)          |
| HBoV + HRV + HRSV               | 0 (0.0)          | 0 (0.0)          | 0 (0.0)         | 0 (0.0)          | 0 (0.0)         | 1 (6.7)          |
| HBoV + HRV + HCoV               | 1 (8.3)          | 0 (0.0)          | 0 (0.0)         | 0 (0.0)          | 1 (25.0)        | 0 (0.0)          |
| HBoV + HEV + HMPV               | 0 (0.0)          | 1 (3.1)          | 0 (0.0)         | 0 (0.0)          | 0 (0.0)         | 0 (0.0)          |
| HBoV + HEV + HPIV               | 1 (8.3)          | 0 (0.0)          | 0 (0.0)         | 0 (0.0)          | 0 (0.0)         | 0 (0.0)          |
| HBoV + HMPV + HPIV              | 0 (0.0)          | 1 (3.1)          | 0 (0.0)         | 0 (0.0)          | 0 (0.0)         | 0 (0.0)          |
| HBoV + FLU + HPIV               | 1 (8.3)          | 0 (0.0)          | 0 (0.0)         | 0 (0.0)          | 0 (0.0)         | 0 (0.0)          |
| HBoV + HAdV + HRV + HRSV        | 0 (0.0)          | 1 (3.1)          | 0 (0.0)         | 0 (0.0)          | 0 (0.0)         | 0 (0.0)          |
| HBoV + HAdV + HEV + HRSV        | 0 (0.0)          | 1 (3.1)          | 0 (0.0)         | 0 (0.0)          | 0 (0.0)         | 0 (0.0)          |
| HBoV + HAdV + HEV + HMPV        | 0 (0.0)          | 1 (3.1)          | 0 (0.0)         | 0 (0.0)          | 0 (0.0)         | 0 (0.0)          |
| HBoV + HAdV + HEV + HCoV        | 1 (8.3)          | 0 (0.0)          | 0 (0.0)         | 0 (0.0)          | 0 (0.0)         | 0 (0.0)          |
| HBoV + HAdV + HEV + HPIV        | 0 (0.0)          | 0 (0.0)          | 1 (100)         | 0 (0.0)          | 0 (0.0)         | 0 (0.0)          |
| HBoV + HEV + FLU + HPIV         | 0 (0.0)          | 0 (0.0)          | 0 (0.0)         | 1 (8.3)          | 0 (0.0)         | 0 (0.0)          |
| HBoV + HAdV + HEV + HRSV + HPIV | 1 (8.3)          | 0 (0.0)          | 0 (0.0)         | 0 (0.0)          | 0 (0.0)         | 0 (0.0)          |
| <b>TOTAL</b>                    | <b>12 (27.3)</b> | <b>32 (72.7)</b> | <b>1 (7.7%)</b> | <b>12 (92.3)</b> | <b>4 (21.0)</b> | <b>15 (79.0)</b> |

31  
 32  
 33
